# Supplementary material
Source: PubMed Central journal article supplement (PMC8600456)
Supplement: jamasurg-e215834-s001.pdf [file jamasurg-e215834-s001.pdf]

## Supplementary Online Content

Loos M, Al-Saeedi M, Hinz U, et al. Categorization of differing types of total pancreatectomy. *JAMA Surg*. Published online November 17, 2021.  
doi:10.1001/jamasurg.2021.5834

**eTable 1.** Total Pancreatectomy With Multivisceral Resections

**eTable 2.** Prior Surgical Procedures and Postoperative Outcomes According to the Extent of Elective Completion Pancreatectomy

This supplementary material has been provided by the authors to give readers additional information about their work

**eTable 1: Total pancreatectomy with multivisceral resections – resected organs in 397 patients (314 Type 3 and 83 Type 4)**

| Organ           | Type 3 |       | Type 4 |       |
|-----------------|--------|-------|--------|-------|
|                 | n=314  | 100%  | n=83   | 100%  |
| Colon           | 120    | 38.2% | 29     | 34.9% |
| Liver           | 61     | 19.4% | 9      | 10.8% |
| Stomach         | 57     | 18.2% | 31     | 37.3% |
| Kidney          | 26     | 8.3%  | 7      | 8.4%  |
| Small intestine | 73     | 23.2% | 23     | 27.7% |
| Adrenal gland   | 39     | 12.4% | 16     | 19.3% |
|                 |        |       |        |       |

**eTable 2: Prior surgical procedures and postoperative outcomes according to the extent of elective completion pancreatectomy**

|                                                                           | Total<br>(n = 171) | Type 1<br>(Standard CPLP)<br>(n = 96) | Type 2<br>(CPLP +<br>PV/SMV<br>resection)<br>(n = 12) | Type 3<br>(CPLP +<br>additional<br>organ)<br>(n = 50) | Type 4<br>(CPLP + artery<br>resection)<br>(n = 13) | P value |
|---------------------------------------------------------------------------|--------------------|---------------------------------------|-------------------------------------------------------|-------------------------------------------------------|----------------------------------------------------|---------|
| Primary operation                                                         |                    |                                       |                                                       |                                                       |                                                    | 0.4968  |
| Pancreatoduodenectomy                                                     | 87 (50.9)          | 43 (44.8)                             | 5 (41.7)                                              | 30 (60.0)                                             | 9 (69.2)                                           |         |
| Distal pancreatectomy                                                     | 71 (41.5)          | 44 (45.8)                             | 7 (58.3)                                              | 16 (32.0)                                             | 4 (30.8)                                           |         |
| Central pancreatectomy                                                    | 3 (1.8)            | 3 (3.1)                               | 0 (0.0)                                               | 0 (0.0)                                               | 0 (0.0)                                            |         |
| DPPHR                                                                     | 10 (5.8)           | 6 (6.3)                               | 0 (0.0)                                               | 4 (8.0)                                               | 0 (0.0)                                            |         |
| Time period from primary operation to completion pancreatectomy (months)* | 27.2 (14.4–56.3)   | 26.1 (12.8–52.4)                      | 25.8 (14.5–34.5)                                      | 28.6 (14.3–75.4)                                      | 38.4 (20.4–61.4)                                   | 0.5009  |
| Mortality                                                                 |                    |                                       |                                                       |                                                       |                                                    |         |
| 30-day                                                                    | 6 (3.5)            | 1 (1.0)                               | 1 (8.3)                                               | 2 (4.0)                                               | 2 (15.4)                                           | 0.0246  |
| 90-day                                                                    | 7 (4.1)            | 1 (1.0)                               | 1 (8.3)                                               | 3 (6.0)                                               | 2 (15.4)                                           | 0.0318  |
| Surgical morbidity                                                        | 69 (40.4)          | 32 (33.3)                             | 3 (25.0)                                              | 25 (50.0)                                             | 9 (69.2)                                           | 0.0235  |
| Length of hospital stay (days)*                                           | 13 (10–18)         | 11 (8–16)                             | 13 (12–17)                                            | 13 (11–20)                                            | 16 (13–27)                                         | 0.0062  |

Values in parentheses are percentages unless indicated otherwise; \*values are median (i.q.r.).

CPLP, Completion pancreatectomy; DPPHR: duodenum preserving pancreatic head resection.
